# Supplementary material for: A Method for Developing Rapid Screening Values for Active Pharmaceutical Ingredients (APIs) in Water and Results of Initial Application for 119 APIs
Source: Int J Environ Res Public Health. 2018 Jun 22;15(7):1308. doi: 10.3390/ijerph15071308 (PMC6069140; doi:10.3390/ijerph15071308)
Supplement: Supplementary file 1 [file ijerph-15-01308-s001.xlsx]

## Sheet: All Data and Values
Table S1: Active Pharmaceutical Ingredient (API) Rapid Assessment Method Inputs, Decisions, Values, and Supporting Information
Supplementary Data for publication "A Method for Developing Rapid Screening Values for Active Pharmaceutical Ingredients (API) in Water and Results of Initial Application for 119 APIs" Information was collected at the time of assessment in 2013/2014.
Active Pharmaceutical Ingredient (API)	CASRN	Anatomical Therapeutic Chemical (ATC) Code	Anatomical Therapeutic Chemical (ATC) Main Group	Anatomical Therapeutic Chemical (ATC) Therapeutic Sub-Group	Anatomical Therapeutic Chemical (ATC) Pharmacological Sub-Group	Anatomical Therapeutic Chemical (ATC) Chemical Sub-Group	Assessed due to inclusion on 2011-2012 most prescribed list or additional API from monitoring	Lowest Therapeutic Dose (LTD) (mg/kg)	Cancer AF	Cancer AF Application Notes	Intraspecies UF	Intraspecies UF Application Notes	LOAEL-NOAEL UF	LOAEL-NOAEL UF Application Notes	Duration UF	Duration UF Application Notes	Database UF	Database UF Application Notes	Endocrine Activity AF	Endocrine Activity AF Application Notes	Total Uncertainty Factor (UF) Applied	Screening Reference Dose (mg/kg)	MDH Screening Water Value 2015 (ug/L)	Manufacturer Label Used	Date of Label Used	Comments
Albuterol	18559-94-9	R03CC02	Respiratory System	Drugs for obstructive airway diseases	Adrenergics for Systemic Use	selective beta-2-adrenoreceopto agonist	Most prescribed list	0.075	1	No cancer or not considered carcinogenic	10	Default applied	3	Default applied	1	Sufficient data available	3	Lack of multigenerational study to appropriately qualify reproductive and developmental risks	1	no evidence of endocrine activity caused by API	100	0.00075	2	Dava Pharmaceuticals	2013-01-01
Alendronate	66376-36-1	M05BA04	Musculo-Skeletal System	Drugs for treatment of bone diseases	Drugs affecting bone structure and mineralization	Bisphosphonates	Most prescribed list	0.063	1	No cancer or not considered carcinogenic	10	Default applied	10	serious adverse effects at LTD	1	Sufficient data available	3	Lack of multigenerational study to appropriately qualify reproductive and developmental risks	1	no evidence of endocrine activity caused by API	300	0.00021	0.6	Apotex Corp	2014-10-01
Allopurinol	315-30-0	M04AA01	Musculo-Skeletal System	Antigout preparations	Antigout preparations	Preparations inhibiting uric acid production	Most prescribed list	2.5	1	No cancer or not considered carcinogenic	10	Default applied	3	Default applied	1	Sufficient data available	3	Lack of multigenerational study to appropriately qualify reproductive and developmental risks	1	no evidence of endocrine activity caused by API	100	0.025	70	Mylan	2013-02-01
Alprazolam	28981-97-7	N05BA12	Nervous System	Psycholeptics	Anxiolytics	Benzodiazepine derivatives	Most prescribed list	0.0094	1	No cancer or not considered carcinogenic	10	Default applied	10	Pregnancy Category D	3	intended for chronic use with sufficient chronic testing with evidence of increase in effects with longer durations	3	Lack of multigenerational study to appropriately qualify reproductive and developmental risks	1	no evidence of endocrine activity caused by API	1000	9.4e-06	0.03	Sandoz	2011-11-01
Amitriptyline	50-48-6	N06AA09	Nervous System	Psychoanaleptics	Antidepressants	Non-selective monoamine reuptake inhibitors	Most prescribed list	0.74	1	No cancer or not considered carcinogenic - no studies	10	Default applied	10	Not intended for use in children, safety for children not established	3	intended for chronic use with no increase in effects with longer durations, extensive human use data, but no or limited chronic animal studies	3	Lack of multigenerational study to appropriately qualify reproductive and developmental risks	10	endocrine effects described in warnings section of label	10000	7.4e-05	0.2	Mylan	2014-12-01	LTD calculated using dosing recommendations for 12-17 years of age (Mean weight for 17 yoa used – 68 kg)
Amlodipine	88150-42-9	C08CA01	Cardiovascular System	Calcium channel blockers	Selective calcium channel blockers with mainly vascular effects	Dihydropyrideine derivatives	Most prescribed list	0.037	1	No cancer or not considered carcinogenic	10	Default applied	3	Default applied	1	Sufficient data available	3	Lack of multigenerational study to appropriately qualify reproductive and developmental risks	1	no evidence of endocrine activity caused by API	100	0.00037	1	Macleods Pharmaceuticals	2015-02-01	LTD calculated using dosing recommendations for 12-17 years of age (Mean weight for 17 yoa used – 68 kg)
Amoxicillin	26787-78-0	J01CA04	Anti-infective for Systemic Use	Antibacterials for systemic use	Beta-lactam antibacterials, penicillins	Penicillins with extended spectrum	Most prescribed list	12.5	1	No cancer or not considered carcinogenic - no studies	10	Default applied	10	serious adverse effects at LTD	10	intended for short-term use	1	sufficient data available	1	no evidence of endocrine activity caused by API	1000	0.013	40	Teva	2015-02-01
Amphetamine	300-62-9	N06BA01	Nervous System	Psychoanaleptics	Psychostimulants, agents used for ADHD and nootropics	Centrally acting sympathomimetics	Most prescribed list	0.039	1	No cancer or not considered carcinogenic	10	Default applied	10	Pregnancy Category C and LTD approximates dose in repro/dev studies	3	intended for chronic use with sufficient chronic testing with evidence of increase in effects with longer durations	1	sufficient data available	10	endocrine effects described in warnings section of label	3000	1.3e-05	0.04	Barr (Adderall)	2013-12-01
Ampicillin	69-53-4	J01CA01	Anti-infective for Systemic Use	Antibacterials for systemic use	Beta-lactam antibacterials, penicillins	Penicillins with extended spectrum	Additional API commonly included in Minnesota monitoring studies	12.5	1	No cancer or not considered carcinogenic	10	Default applied	10	serious adverse effects at LTD	10	intended for short-term use	3	Lack of multigenerational study to appropriately qualify reproductive and developmental risks	1	no evidence of endocrine activity caused by API	3000	0.0042	10	Sandoz	2012-11-01
Atenolol	29122-68-7	C07AB03	Cardiovascular System	Beta blocking agents	Beta-lactam antibacterials, penicillins	Beta blocking agents, selective	Most prescribed list	0.63	1	Evidence of threshold MOA, and HED threshold well above LTD/MRHD	10	Default applied	10	Pregnancy Category D	3	intended for chronic use with sufficient chronic testing with evidence of increase in effects with longer durations	3	Lack of multigenerational study to appropriately qualify reproductive and developmental risks	1	no evidence of endocrine activity caused by API	1000	0.00063	2	Mylan	2013-01-01
Atorvastatin	134523-00-5	C10AA05	Cardiovascular System	Lipid modifying agents	Lipid modifying agents, plain	HMG CoA reductase inhibitors	Most prescribed list	0.13	1	Evidence of threshold MOA, and HED threshold well above LTD/MRHD	10	Default applied	10	Pregnancy Category X	3	intended for chronic use with sufficient chronic testing with evidence of increase in effects with longer durations	1	sufficient data available	10	endocrine effects described in warnings section of label	3000	4.3e-05	0.1	Parke-Davis	2014-05-01	Statin class APIs were evaluated together when assigning an Endocrine Activity AF. APIs included in this class evaluation were Atorvastatin, Lovastatin, Pravastatin, Rosuvastatin, and Simvastatin. The APIs were all assigned an Endocrine Activity AF of 10.
Azithromycin	83905-01-5	J01FA10	Anti-infective for Systemic Use	Antibacterials for systemic use	Macrolides, Lincosamides and streptogramins	Macrolides	Most prescribed list	3.13	1	No cancer or not considered carcinogenic - no studies	10	Default applied	10	serious adverse effects at LTD	10	intended for short-term use	3	Lack of multigenerational study to appropriately qualify reproductive and developmental risks	1	no evidence of endocrine activity caused by API	3000	0.001	3	Teva	2014-09-01
Benztropine	86-13-5	N04AC01	Nervous System	Anti-Parkinson drugs	Anticholinergic agents	Ethers of tropine or tropine derivatives	Additional API commonly included in Minnesota monitoring studies	0.013	1	No cancer or not considered carcinogenic - no studies	10	Default applied	3	Default applied	10	intended for chronic use with no or limited chronic testing with evidence of increase in effects with longer durations	10	No animal studies including reproductive and developmental studies, described or available on label or supporting sources	1	no evidence of endocrine activity caused by API	3000	4.3e-06	0.01	Bayshore	2014-01-01
Betaxolol	63659-18-7	C07AB05	Cardiovascular System	Beta blocking agents	Beta blocking agents	Beta blocking agents, selective	Additional API commonly included in Minnesota monitoring studies	0.13	1	No cancer or not considered carcinogenic	10	Default applied	10	Not intended for use in children, safety for children not established; serious adverse effects at LTD	3	intended for chronic use with sufficient chronic testing with evidence of increase in effects with longer durations	3	Lack of multigenerational study to appropriately qualify reproductive and developmental risks	1	no evidence of endocrine activity caused by API	1000	0.00013	0.4	Epic	2014-12-01
Bisoprolol	66722-44-9	C07AB07	Cardiovascular System	Beta blocking agents	Beta blocking agents	Beta blocking agents, selective	Additional API commonly included in Minnesota monitoring studies	0.6	1	No cancer or not considered carcinogenic	10	Default applied	10	serious adverse effects at LTD	3	intended for chronic use with sufficient chronic testing with evidence of increase in effects with longer durations	3	Lack of multigenerational study to appropriately qualify reproductive and developmental risks	1	no evidence of endocrine activity caused by API	1000	0.0006	2	Unichem	2011-09-01
Carisoprodol	78-44-4	M03BA02	Musculo-Skeletal System	Muscle relaxants	Muscle relaxants, centrally acting agents	Carbamic acid esters	Most prescribed list	9.38	1	No cancer or not considered carcinogenic; Evidence of threshold MOA, and HED threshold well above LTD/MRHD	10	Default applied	10	Pregnancy Category C and LTD approximates dose in repro/dev studies	10	intended for short-term use	1	sufficient data available	1	no evidence of endocrine activity caused by API	1000	0.0094	30	Qualitest	2013-10-01
Carvedilol	72956-09-3	C07AC02	Cardiovascular System	Beta blocking agents	Beta blocking agents	Alpha and beta blocking agents	Most prescribed list	0.313	1	No cancer or not considered carcinogenic	10	Default applied	10	indicated for life threatening conditions	1	Sufficient data available	3	Lack of multigenerational study to appropriately qualify reproductive and developmental risks	1	no evidence of endocrine activity caused by API	300	0.001	3	Apotex Corp	2013-05-01
Celecoxib	169590-42-5	M01AH01	Musculo-Skeletal System	Anti-inflammatory and antirheumatic products	Anti-inflammatory and antirheumatic products, non-steroids	Coxibs	Most prescribed list	2.5	1	No cancer or not considered carcinogenic	10	Default applied	10	Applicable Black Box Warning	3	intended for chronic use with sufficient chronic testing with evidence of increase in effects with longer durations	3	Lack of multigenerational study to appropriately qualify reproductive and developmental risks	1	no evidence of endocrine activity caused by API	1000	0.0025	7	Actavis Pharma	2014-08-01
Cephalexin	15686-71-2	J01DB01	Anti-infective for Systemic Use	Antibacterials for systemic use	Other beta-lactam antibacterials	First-generation cephalosporins	Most prescribed list	12.5	1	No cancer or not considered carcinogenic - no studies	10	Default applied	3	Default applied	10	intended for short-term use	3	Lack of multigenerational study to appropriately qualify reproductive and developmental risks	1	no evidence of endocrine activity caused by API	1000	0.013	40	Teva	2012-07-01
Cimetidine	51481-61-9	A02BA01	Alimentary tract and metabolism	Drugs for acid related disorders	Drugs for peptic ulcer and gastro-esophageal reflux disease (GORD)	H2-receptor antagonists	Additional API commonly included in Minnesota monitoring studies	10	1	No cancer or not considered carcinogenic - benign tumors only	10	Default applied	10	Not intended for use in children, safety for children not established	1	Sufficient data available	3	Lack of multigenerational study to appropriately qualify reproductive and developmental risks	3	small changes in hormone levels in animals; infrequent endocrine effects in humans	1000	0.01	30	Teva	2015-04-01
Ciprofloxacin	85721-33-1	J01MA02	Anti-infective for Systemic Use	Antibacterials for systemic use	Quinolone antibacterials	Fluoroquinolones	Most prescribed list	6.25	1	No cancer or not considered carcinogenic	10	Default applied	10	Applicable Black Box Warning	10	intended for short-term use	3	Lack of multigenerational study to appropriately qualify reproductive and developmental risks	1	no evidence of endocrine activity caused by API	3000	0.0021	6	Dr. Reddy's	2011-08-01
Clarithromycin	81103-11-9	J01FA09	Anti-infective for Systemic Use	Antibacterials for systemic use	Macrolides, Lincosamides and streptogramins	Macrolides	Additional API commonly included in Minnesota monitoring studies	6.25	1	No cancer or not considered carcinogenic - no studies	10	Default applied	10	serious adverse effects at LTD	10	intended for short-term use	3	Lack of multigenerational study to appropriately qualify reproductive and developmental risks	1	no evidence of endocrine activity caused by API	3000	0.0021	6	AbbVie	2015-01-01
Clavulanate	58001-44-8	J01CR02	Anti-infective for Systemic Use	Antibacterials for systemic use	Beta-lactam antibacterials, penicillins	Combinations of penicillins, incl. beta-lactamase inhibitors	Most prescribed list	3.13	1	No cancer or not considered carcinogenic - no studies	10	Default applied	3	Default applied	10	intended for short-term use	3	Lack of multigenerational study to appropriately qualify reproductive and developmental risks	1	no evidence of endocrine activity caused by API	1000	0.0031	9	Apotex Corp	2014-11-01
Clindamycin	18323-44-9	J01FF01	Anti-infective for Systemic Use	Antibacterials for systemic use	Macrolides, Lincosamides and streptogramins	Lincosamides	Most prescribed list	7.5	1	No cancer or not considered carcinogenic - no studies	10	Default applied	10	serious adverse effects at LTD	10	intended for short-term use	3	Lack of multigenerational study to appropriately qualify reproductive and developmental risks	1	no evidence of endocrine activity caused by API	3000	0.0025	7	Ranbaxy	2013-06-01
Clonazepam	1622-61-3	N03AE01	Nervous System	Antiepileptics	Antiepileptics	Benzodiazepine derivatives	Most prescribed list	0.013	1	No cancer or not considered carcinogenic - no studies	10	Default applied	10	Pregnancy Category D	10	intended for chronic use with no or limited chronic testing with evidence of increase in effects with longer durations	3	Lack of multigenerational study to appropriately qualify reproductive and developmental risks	1	no evidence of endocrine activity caused by API	3000	4.3e-06	0.01	Teva	2013-09-01
Clonidine	4205-90-7	C02AC01	Cardiovascular System	Antihypertensives	Antiadrenergic agents, centrally acting	Imidazoline receptor agonists	Additional API commonly included in Minnesota monitoring studies	0.0025	1	No cancer or not considered carcinogenic	10	Default applied	10	Pregnancy Category C and LTD approximates dose in repro/dev studies	1	Sufficient data available	3	Lack of multigenerational study to appropriately qualify reproductive and developmental risks	1	no evidence of endocrine activity caused by API	300	8.3e-06	0.02	Boehringer Ingelheim	2012-06-01
Clopidogrel	113665-84-2	B01AC04	Blood and Blood Forming Organs	Antithrombotic agents	Antithrombotic agents	Platelet aggregation inhibitors excl. heparin	Most prescribed list	0.94	1	No cancer or not considered carcinogenic	10	Default applied	10	Black Box Warning	1	Sufficient data available	3	Lack of multigenerational study to appropriately qualify reproductive and developmental risks	1	no evidence of endocrine activity caused by API	300	0.0031	9	Bristol-Myers Squibb/Sanofi	2013-12-01
Codeine	76-57-3	N02AA59	Nervous System	Analgesics	Opioids	Natural opium alkaloids	Most prescribed list	0.19	1	No cancer or not considered carcinogenic - no studies	10	Default applied	3	Default applied	10	intended for short-term use	3	Lack of multigenerational study to appropriately qualify reproductive and developmental risks	1	no evidence of endocrine activity caused by API	1000	0.00019	0.5	Qualitest	2013-10-01
Cyclobenzaprine	303-53-7	M03BX08	Musculo-Skeletal System	Muscle relaxants	Muscle relaxants, centrally acting agents	Other centrally acting agents	Most prescribed list	0.19	1	No cancer or not considered carcinogenic	10	Default applied	10	Not intended for use in children, safety for children not established	10	intended for short-term use	3	Lack of multigenerational study to appropriately qualify reproductive and developmental risks	3	infrequent endocrine effects in humans with no animal studies to support effects	10000	1.9e-05	0.05	Mylan	2013-07-01
Demeclocycline	127-33-3	J01AA01	Anti-infective for Systemic Use	Antibacterials for systemic use	Tetracyclines	Tetracyclines	Additional API commonly included in Minnesota monitoring studies	7	1	No cancer or not considered carcinogenic - endocrine activity more appropriate	10	Default applied	10	Pregnancy Category D	10	intended for short-term use	3	Lack of multigenerational study to appropriately qualify reproductive and developmental risks	10	endocrine effects in reported in animals that are relevant to humans	30000	0.00023	0.6	Core Pharma	2012-10-01	•LTD calculated using BW dosing information directly from the corresponding label for any <18 years of age, no separate calculations •Tetracycline class APIs were evaluated together when assigning AFs for Cancer and Endocrine Activity. APIs included in this class evaluation for AFs were Demeclocycline, Doxycycline, Minocycline, Oxytetracycline, and Tetracycline. The APIs were all assigned a Cance…
Diazepam	439-14-5	N05BA01	Nervous System	Psychloleptics	Anxiolytics	Benzodiazepine derivatives	Most prescribed list	0.044	1	Evidence of threshold MOA, and HED threshold well above LTD/MRHD	10	Default applied	10	Pregnancy Category D	3	intended for chronic use with sufficient chronic testing with evidence of increase in effects with longer durations	1	sufficient data available	1	no evidence of endocrine activity caused by API	300	0.00015	0.4	Actavis Pharma	2014-10-01	LTD calculated using dosing recommendations for 12-17 years of age (Mean weight for 17 yoa used – 68 kg)
Diclofenac	15307-86-5	M01AB05	Musculo-Skeletal System	Anti-inflammatory and antirheumatic products	Anti-inflammatory and antirheumatic products, non-steroids	Acetic acid derivatives and related substances	Additional API commonly included in Minnesota monitoring studies	1.25	1	No cancer or not considered carcinogenic - no studies	10	Default applied	10	Black Box Warning	3	intended for chronic use with sufficient chronic testing with evidence of increase in effects with longer durations	1	sufficient data available	1	no evidence of endocrine activity caused by API	300	0.0042	10	Apotex Corp	2015-03-01
Digoxin	20830-75-5	C01AA05	Cardiovascular System	Cardiac Therapy	Cardiac glycosides	Digitalis glycosides	Most prescribed list	0.0016	10	Sufficient evidence of threshold MOA, AND HED threshold near or below LTD/MRHD - Steroid Class analysis	10	Default applied	3	Default applied	3	intended for chronic use with no increase in effects with longer durations, extensive human use data, but no or limited chronic animal studies	10	No animal studies including reproductive and developmental studies, described or available on label or supporting sources	1	no evidence of endocrine activity caused by API	10000	1.6e-07	0.0004	Lannett	2012-02-01
Diltiazem	42399-41-7	C08DB01	Cardiovascular System	Calcium channel blockers	Selective calcium channel blockers with direct cardiac effects	Benzothiazepine derivatives	Additional API commonly included in Minnesota monitoring studies	1.5	1	No cancer or not considered carcinogenic	10	Default applied	10	serious adverse effects at LTD	3	intended for chronic use with sufficient chronic testing with evidence of increase in effects with longer durations	3	Lack of multigenerational study to appropriately qualify reproductive and developmental risks	1	no evidence of endocrine activity caused by API	1000	0.0015	4	Valeant Pharma	2014-10-01
Doxepin	1668-19-5	N06AA12	Nervous System	Psychoanaleptics	Antidepressants	Non-selective monoamine reuptake inhibitors	Additional API commonly included in Minnesota monitoring studies	0.94	1	No cancer or not considered carcinogenic - no studies	10	Default applied	3	Default applied	3	intended for chronic use with no increase in effects with longer durations, extensive human use data, but no or limited chronic animal studies	3	Lack of multigenerational study to appropriately qualify reproductive and developmental risks	10	endocrine effects described in adverse reactions section of label	3000	0.00032	0.9	Par	2015-01-01
Doxycycline	564-25-0	J01AA02	Anti-infective for Systemic Use	Antibacterials for systemic use	Tetracyclines	Tetracyclines	Additional API commonly included in Minnesota monitoring studies	0.91	1	No cancer or not considered carcinogenic - endocrine activity more appropriate	10	Default applied	10	Pregnancy Category D	10	intended for short-term use	3	Lack of multigenerational study to appropriately qualify reproductive and developmental risks	10	endocrine effects in reported in animals that are relevant to humans	30000	3e-05	0.08	Galderma	2014-12-01	•LTD calculated using BW dosing information directly from the corresponding label for any <18 years of age, no separate calculations •Tetracycline class APIs were evaluated together when assigning AFs for Cancer and Endocrine Activity. APIs included in this class evaluation for AFs were Demeclocycline, Doxycycline, Minocycline, Oxytetracycline, and Tetracycline. The APIs were all assigned a Cance…
Drospirenone	67392-87-4	G03AA12	Genito Urinary System and Sex Hormones	Sex hormones and modulators of the genital system	Hormonal contraceptives for systemic use	Progestogens and estrogens, fixed combinations	Most prescribed list	0.038	10	Sufficient evidence of threshold MOA, AND HED threshold near or below LTD/MRHD - Harderian gland and adrenal gland tumors at doses	10	Default applied	10	Applicable Black Box Warning	3	intended for chronic use with sufficient chronic testing with evidence of increase in effects with longer durations	3	Lack of multigenerational study to appropriately qualify reproductive and developmental risks	10	endocrine effects intended effects of API	10000	3.8e-06	0.01	Teva	2012-04-01
Duloxetine	116539-59-4	N06AX21	Nervous System	Psychoanaleptics	Antidepressants	Other antidepressants	Most prescribed list	0.5	1	Evidence of threshold MOA, and HED threshold well above LTD/MRHD	10	Default applied	10	Pregnancy Category C and LTD approximates dose in repro/dev studies; serious adverse effects at LTD	1	Sufficient data available	1	sufficient data available	10	infrequent endocrine effects in humans; endocrine effects intended effects of API	1000	0.0005	1	Eli Lily	2014-12-01
Enalapril	75847-73-3	C09AA02	Cardiovascular System	Agents acting on the renin-angiotensin system	ACE inhibitors, plain	ACE inhibitors, plain	Most prescribed list	0.063	1	No cancer or not considered carcinogenic	10	Default applied	10	Pregnancy Category D	1	Sufficient data available	3	Lack of multigenerational study to appropriately qualify reproductive and developmental risks	1	no evidence of endocrine activity caused by API	300	0.00021	0.6	Mylan	2014-04-01
Erythromycin	114-07-8	J01FA01	Anti-infective for Systemic Use	Antibacterials for systemic use	Macrolides, Lincosamides and streptogramins	Macrolides	Additional API commonly included in Minnesota monitoring studies	12.5	1	No cancer or not considered carcinogenic	10	Default applied	3	Default applied	10	intended for short-term use	3	Lack of multigenerational study to appropriately qualify reproductive and developmental risks	1	no evidence of endocrine activity caused by API	1000	0.013	40	Midlothian	2013-07-01
Escitalopram	128196-01-0	N06AB10	Nervous System	Psychoanaleptics	Antidepressants	Selective serotonin reuptake inhibitors	Most prescribed list	0.13	1	Evidence of threshold MOA, and HED threshold well above LTD/MRHD	10	Default applied	10	serious adverse effects at LTD	1	Sufficient data available	3	Lack of multigenerational study to appropriately qualify reproductive and developmental risks	10	endocrine effects intended effects of API; endocrine effects described in warnings section of label	3000	4.3e-05	0.1	Forest	2014-10-01
Ezetimibe	163222-33-1	C10BA02	Cardiovascular System	Lipid modifying agents	Lipid modifying agents, combinations	HMG CoA reductase inhibitors in combination with other lipid modifying agents	Most prescribed list	0.125	1	No cancer or not considered carcinogenic	10	Default applied	10	Pregnancy Category X	1	Sufficient data available	3	Lack of multigenerational study to appropriately qualify reproductive and developmental risks	1	no evidence of endocrine activity caused by API	300	0.00042	1	Merck	2015-03-01
Fenofibrate	49562-28-9	C10AB05	Cardiovascular System	Lipid modifying agents	Lipid modifying agents, plain	Fibrates	Most prescribed list	0.6	10	Sufficient evidence of threshold MOA, AND HED threshold near or below LTD/MRHD - liver carcinomas	10	Default applied	10	Not intended for use in children, safety for children not established	1	Sufficient data available	3	Lack of multigenerational study to appropriately qualify reproductive and developmental risks	1	no evidence of endocrine activity caused by API	3000	0.0002	0.6	Apotex Corp	2013-10-01
Fenoprofen	31879-05-7	M01AE04	Musculo-Skeletal System	Anti-inflammatory and antirheumatic products	Anti-inflammatory and antirheumatic products, non-steroids	Propionic acid derivatives	Additional API commonly included in Minnesota monitoring studies	2.5	1	No cancer or not considered carcinogenic - no studies	10	Default applied	10	Applicable Black Box Warning	10	intended for chronic use with no or limited chronic testing with evidence of increase in effects with longer durations	3	Lack of multigenerational study to appropriately qualify reproductive and developmental risks	1	no evidence of endocrine activity caused by API	3000	0.00083	2	Mylan	2012-08-01
Fluconazole	86386-73-4	J02AC01	Anti-infective for Systemic Use	Antimycotics for systemic use	Antimycotics for systemic use	Triazole derivatives	Most prescribed list	1.25	1	No cancer or not considered carcinogenic	10	Default applied	10	Pregnancy Category D	10	intended for short-term use	3	Lack of multigenerational study to appropriately qualify reproductive and developmental risks	3	effects seen in animals but not observed in humans (likely species specific)	10000	0.00013	0.4	Dr. Reddy's	2014-04-01
Fluoxetine	54910-89-3	N06AB03	Nervous System	Psychoanaleptics	Antidepressants	Selective serotonin reuptake inhibitors	Most prescribed list	0.25	1	No cancer or not considered carcinogenic	10	Default applied	10	Pregnancy Category C and LTD approximates dose in repro/dev studies	1	Sufficient data available	3	Lack of multigenerational study to appropriately qualify reproductive and developmental risks	10	endocrine effects intended effects of API; endocrine effects described in warnings section of label	3000	8.3e-05	0.2	Edgemont	2014-09-01
Furosemide	54-31-9	C03CA01	Cardiovascular System	Diuretics	High-ceiling diuretics	Sulfonamides, plain	Additional API commonly included in Minnesota monitoring studies	0.25	1	No cancer or not considered carcinogenic	10	Default applied	3	Default applied	3	intended for chronic use with sufficient chronic testing with evidence of increase in effects with longer durations	3	Lack of multigenerational study to appropriately qualify reproductive and developmental risks	1	no evidence of endocrine activity caused by API	300	0.00083	2	Excellium Pharma	2012-08-01
Gabapentin	60142-96-3	N03AX12	Nervous System	Antiepileptics	Antiepileptics	Other antiepileptics	Most prescribed list	11.3	1	Evidence of threshold MOA, and HED threshold well above LTD/MRHD	10	Default applied	3	Default applied	1	Sufficient data available	3	Lack of multigenerational study to appropriately qualify reproductive and developmental risks	1	no evidence of endocrine activity caused by API	100	0.11	300	Amneal	2014-08-01
Gemfibrozil	25812-30-0	C10AB04	Cardiovascular System	Lipid modifying agents	Lipid modifying agents, plain	Fibrates	Additional API commonly included in Minnesota monitoring studies	15	10	Sufficient evidence of threshold MOA, AND HED threshold near or below LTD/MRHD - liver and interstitial testes tumors	10	Default applied	10	Pregnancy Category C and LTD approximates dose in repro/dev studies; not intended for use in children, safety for children not established	3	intended for chronic use with sufficient chronic testing with evidence of increase in effects with longer durations	1	Sufficient data available	1	no evidence of endocrine activity caused by API	3000	0.005	10	Blu Pharma	2014-09-01
Glipizide	29094-61-9	A10BB07	Alimentary tract and metabolism	Drugs used in diabetes	Blood glucose lowering drugs, excl. insulins	Sulfonylureas	Most prescribed list	0.19	1	No cancer or not considered carcinogenic	10	Default applied	10	Not intended for use in children, safety for children not established; Pregnancy Category C and LTD approximates dose in repro/dev studies	3	intended for chronic use with sufficient chronic testing with evidence of increase in effects with longer durations	3	Lack of multigenerational study to appropriately qualify reproductive and developmental risks	10	endocrine effects intended effects of API	10000	1.9e-05	0.05	Mylan	2013-08-01
Glyburide	10238-21-8	A10BB01	Alimentary tract and metabolism	Drugs used in diabetes	Blood glucose lowering drugs, excl. insulins	Sulfonylureas	Most prescribed list	0.016	1	No cancer or not considered carcinogenic	10	Default applied	10	Not intended for use in children, safety for children not established; serious adverse effects at LTD	3	intended for chronic use with sufficient chronic testing with evidence of increase in effects with longer durations	3	Lack of multigenerational study to appropriately qualify reproductive and developmental risks	10	endocrine effects intended effects of API	10000	1.6e-06	0.004	Teva	2014-01-01
Hydrochlorothiazide	58-93-5	C03AA03	Cardiovascular System	Diuretics	Low-ceiling diuretics, thiazides	Thiazides, plain	Most prescribed list	0.16	1	Species specific cancer not relevant to humans: Evidence of threshold MOA, and HED threshold well above LTD/MRHD	10	Default applied	10	Not intended for use in children, safety for children not established	3	intended for chronic use with sufficient chronic testing with evidence of increase in effects with longer durations	3	Lack of multigenerational study to appropriately qualify reproductive and developmental risks	10	endocrine effects described in warnings section of label	10000	1.6e-05	0.04	Teva	2013-08-01
Hydrocodone	125-29-1	R05DA03	Respiratory System	Cough and cold preparations	Cough suppressants, excl. combinations with expectorants	Opium alkaloids and derivatives	Most prescribed list	0.25	1	No cancer or not considered carcinogenic	10	Default applied	10	Black Box Warning; Not intended for use in children, safety for children not established	3	intended for chronic use with sufficient chronic testing with evidence of increase in effects with longer durations	3	Lack of multigenerational study to appropriately qualify reproductive and developmental risks	10	endocrine effects described in pharmacodynamics section of label	10000	2.5e-05	0.07	Purdue	2014-11-01
Hydrocortisone	50-23-7	H02AB09	Systemic Hormonal Preparations, excl. Sex Hormones and Insulins	Corticosteroids for systemic use	Corticosteroids for systemic use, plain	Glucocorticoids	Additional API commonly included in Minnesota monitoring studies	0.25	1	No cancer or not considered carcinogenic - no studies	10	Default applied	10	Pregnancy Category C and LTD approximates dose in repro/dev studies	10	intended for chronic use with no or limited chronic testing with evidence of increase in effects with longer durations	3	Lack of multigenerational study to appropriately qualify reproductive and developmental risks	10	endocrine effects intended effects of API	30000	8.3e-06	0.02	Pharmacia and Upjohn	2014-08-01
Ibuprofen	15687-27-1	M01AE01	Musculo-Skeletal System	Anti-inflammatory and antirheumatic products	Anti-inflammatory and antirheumatic products, non-steroids	Propionic acid derivatives	Most prescribed list	20	1	No cancer or not considered carcinogenic - no studies	10	Default applied	10	Applicable Black Box Warning	10	intended for chronic use with no or limited chronic testing with evidence of increase in effects with longer durations	3	Lack of multigenerational study to appropriately qualify reproductive and developmental risks	1	no evidence of endocrine activity caused by API	3000	0.0067	5	Bryant Ranch	2014-07-01	A RSC of 0.2 was used to calculate the Screening Water Value of APIs commonly found in both prescription only and OTC products
Imipramine	50-49-7	N06AA02	Nervous System	Psychoanaleptics	Antidepressants	Non-selective monoamine reuptake inhibitors	Additional API commonly included in Minnesota monitoring studies	0.37a	1	No cancer or not considered carcinogenic - no studies	10	Default applied	10	Pregnancy Category D	3	intended for chronic use with no increase in effects with longer durations, extensive human use data, but no or limited chronic animal studies	3	Lack of multigenerational study to appropriately qualify reproductive and developmental risks	10	endocrine effects described in adverse reactions section of label	10000	3.7e-05	0.1	Mallinckrodt	2014-05-01	LTD calculated using dosing recommendations for 12-17 years of age (Mean weight for 17 yoa used – 68 kg)
Indomethacin	53-86-1	M01AB01	Musculo-Skeletal System	Anti-inflammatory and antirheumatic products	Anti-inflammatory and antirheumatic products, non-steroids	Acetic acid derivatives and related substances	Additional API commonly included in Minnesota monitoring studies	0.63	1	No cancer or not considered carcinogenic	10	Default applied	10	Black Box Warning; Pregnancy Category D	3	intended for chronic use with sufficient chronic testing with evidence of increase in effects with longer durations	1	Sufficient data available	1	no evidence of endocrine activity caused by API	300	0.0021	6	Iroko Pharma	2014-02-01
Ketoprofen	22071-15-4	M01AE03	Musculo-Skeletal System	Anti-inflammatory and antirheumatic products	Anti-inflammatory and antirheumatic products, non-steroids	Propionic acid derivatives	Additional API commonly included in Minnesota monitoring studies	0.94	1	No cancer or not considered carcinogenic	10	Default applied	10	Black Box Warning; Not intended for use in children, safety for children not established	3	intended for chronic use with sufficient chronic testing with evidence of increase in effects with longer durations	3	Lack of multigenerational study to appropriately qualify reproductive and developmental risks	1	no evidence of endocrine activity caused by API	1000	0.00094	3	Teva	2013-12-01
Lamotrigine	84057-84-1	N03AX09	Nervous System	Antiepileptics	Antiepileptics	Other antiepileptics	Additional API commonly included in Minnesota monitoring studies	2.81	1	No cancer or not considered carcinogenic	10	Default applied	10	serious adverse effects at LTD; Pregnancy Category C and LTD approximates dose in repro/dev studies	1	Sufficient data available	3	Lack of multigenerational study but with some reproductive data; limited information to address melanin accumulation indicated in Warnings	1	no evidence of endocrine activity caused by API	300	0.0094	30	GlaxoSmithKline	2015-03-01						5
Levothyroxine	51-48-9	H03AA01	Systemic Hormonal Preparations, excl. Sex Hormones and Insulins	Thyroid therapy	Thyroid preparations	Thyroid hormones	Most prescribed list	0.0013	1	No cancer or not considered carcinogenic - no studies	10	Default applied	3	Default applied	1	Sufficient data available	1	Sufficient data available	10	endocrine effects intended effects of API	300	4.3e-06	0.01	AbbVie	2013-10-01	When an endocrine active API had endocrine activity as the intended effect, both a LOAEL-NOAEL UF of 10 and an Endocrine Activity AF of 10 were applied to be protective of low level potencies. However, in the case of Levothyroxine, a LOAEL-NOAEL UF of 3 and an Endocrine Activity AF of 10 was applied. This was done because Levothyroxine is designed to mimic endogenous thyroid hormone, acting just …
Lisdexamfetamine	608137-32-2	N06BA12	Nervous System	Psychoanaleptics	Psychostimulants, agents used for ADHD and nootropics	Centrally acting sympathomimetics	Most prescribed list	0.38	1	No cancer or not considered carcinogenic	10	Default applied	10	serious adverse effects at LTD	3	intended for chronic use with sufficient chronic testing with evidence of increase in effects with longer durations	1	Sufficient data available	10	endocrine effects described in warnings section of label	3000	0.00013	0.4	Shire	2015-04-01
Lisinopril	76547-98-3	C09AA03	Cardiovascular System	Agents acting on the renin-angiotensin system	ACE inhibitors, plain	ACE inhibitors, plain	Most prescribed list	0.063	1	No cancer or not considered carcinogenic	10	Default applied	10	Black Box Warning; Pregnancy Category D	3	intended for chronic use with sufficient chronic testing with evidence of increase in effects with longer durations	3	Lack of multigenerational study to appropriately qualify reproductive and developmental risks	3	infrequent endocrine effects in humans with no animal studies to support effects	3000	2.1e-05	0.06	Apotex Corp	2015-02-01
Lomefloxacin	98079-51-7	J01MA07	Anti-infective for Systemic Use	Antibacterials for systemic use	Quinolone antibacterials	Fluoroquinolones	Additional API commonly included in Minnesota monitoring studies	20	1	Cancer localized at site of administration and not relevant to oral administration alone	10	Default applied	10	Not intended for use in children, safety for children not established; Pregnancy Category C and LTD approximates dose in repro/dev studies	10	intended for short-term use	3	Lack of multigenerational study to appropriately qualify reproductive and developmental risks	1	no evidence of endocrine activity caused by API	3000	0.0067	20	G.D. Searle	2006-05-01	Lomefloxacin: There is an identified label in DailyMed from 2006 that was used for this evaluation. However, there are currently no active products on the market at this time. Lomefloxacin was included in the evaluation as it has only recently been discontinued
Lorazepam	846-49-1	N05BA06	Nervous System	Psycholeptics	Anxiolytics	Benzodiazepine derivatives	Most prescribed list	0.025	1	No cancer or not considered carcinogenic	10	Default applied	10	Pregnancy Category D	10	intended for short-term use	3	Lack of multigenerational study to appropriately qualify reproductive and developmental risks	1	no evidence of endocrine activity caused by API	3000	8.3e-06	0.02	Valeant Pharma	2013-05-01
Losartan	114798-26-4	C09CA01	Cardiovascular System	Agents acting on the renin-angiotensin system	Angiotensin II antagonists, plain	Angiotensin II antagonists, plain	Most prescribed list	0.63	1	No cancer or not considered carcinogenic	10	Default applied	10	Black Box Warning; Pregnancy Category D	1	Sufficient data available	3	Lack of multigenerational study to appropriately qualify reproductive and developmental risks	1	no evidence of endocrine activity caused by API	300	0.0021	6	Teva	2015-04-01
Lovastatin	75330-75-5	C10AA02	Cardiovascular System	Lipid modifying agents	Lipid modifying agents, plain	HMG CoA reductase inhibitors	Most prescribed list	0.13	1	Evidence of threshold MOA, and HED threshold well above LTD/MRHD	10	Default applied	10	Pregnancy Category X	3	intended for chronic use with sufficient chronic testing with evidence of increase in effects with longer durations	3	Lack of multigenerational study to appropriately qualify reproductive and developmental risks	10	endocrine effects described in warnings section of label	10000	1.3e-05	0.04	Lupin	2014-06-01	Statin class APIs were evaluated together when assigning an Endocrine Activity AF. APIs included in this class evaluation were Atorvastatin, Lovastatin, Pravastatin, Rosuvastatin, and Simvastatin. The APIs were all assigned an Endocrine Activity AF of 10
Mefenamic acid	61-68-7	M01AG01	Musculo-Skeletal System	Anti-inflammatory and antirheumatic products	Anti-inflammatory and antirheumatic products, non-steroids	Fenamates	Additional API commonly included in Minnesota monitoring studies	12.5	1	No cancer or not considered carcinogenic - no studies	10	Default applied	10	Applicable Black Box Warning	10	intended for short-term use	3	Lack of multigenerational study to appropriately qualify reproductive and developmental risks	1	no evidence of endocrine activity caused by API	3000	0.0042	10	Breckenridge	2014-03-01
Meloxicam	71125-38-7	M01AC06	Musculo-Skeletal System	Anti-inflammatory and antirheumatic products	Anti-inflammatory and antirheumatic products, non-steroids	Oxicams	Most prescribed list	0.094	1	No cancer or not considered carcinogenic	10	Default applied	10	Black Box Warning; Pregnancy Category D	3	intended for chronic use with sufficient chronic testing with evidence of increase in effects with longer durations	3	Lack of multigenerational study to appropriately qualify reproductive and developmental risks	1	no evidence of endocrine activity caused by API	1000	9.4e-05	0.3	Lupin	2014-01-01
Memantine	19982-08-2	N06DX01	Nervous System	Psychoanaleptics	Anti-dementia drugs	Other anti-dementia drugs	Most prescribed list	0.25	1	No cancer or not considered carcinogenic	10	Default applied	10	Not intended for use in children, safety for children not established	3	intended for chronic use with sufficient chronic testing with evidence of increase in effects with longer durations	3	Lack of multigenerational study to appropriately qualify reproductive and developmental risks	1	no evidence of endocrine activity caused by API	1000	0.00025	0.7	Forest	2013-10-01
Meprobamate	57-53-4	N05BC01	Nervous System	Psycholeptics	Anxiolytics	Carbamates	Most prescribed list	3.98	1	No cancer or not considered carcinogenic - no studies	10	Default applied	3	Default applied	10	intended for short-term use	3	Lack of multigenerational study to appropriately qualify reproductive and developmental risks	1	no evidence of endocrine activity caused by API	1000	0.004	10	Heritage	2013-08-01	LTD calculated using dosing recommendations for 6-12 years of age (Mean weight for 12 yoa used – 50.3 kg)
Metformin	657-24-9	A10BA02	Alimentary tract and metabolism	Drugs used in diabetes	Blood glucose lowering drugs, excl. insulins	Biquanides	Most prescribed list	14.71a	1	No cancer or not considered carcinogenic	10	Default applied	10	Black Box Warning	3	intended for chronic use with sufficient chronic testing with evidence of increase in effects with longer durations	3	Lack of multigenerational study to appropriately qualify reproductive and developmental risks	10	endocrine effects intended effects of API	10000	0.0015	4	Mylan	2012-04-01	LTD calculated using dosing recommendations for 12-17 years of age (Mean weight for 17 yoa used – 68 kg)
Methylphenidate	113-45-1	N06BA04	Nervous System	Psychoanaleptics	Psychostimulants, agents used for ADHD and nootropics	Centrally acting sympathomimetics	Most prescribed list	0.25	1	Evidence of threshold MOA, and HED threshold well above LTD/MRHD	10	Default applied	10	serious adverse effects at LTD	3	intended for chronic use with sufficient chronic testing with evidence of increase in effects with longer durations	3	Lack of multigenerational study to appropriately qualify reproductive and developmental risks	1	no evidence of endocrine activity caused by API	1000	0.00025	0.7	Actavis Pharma	2013-12-01
Methylprednisolone	83-43-2	H02AB04	Systemic Hormonal Preparations, excl. Sex Hormones and Insulins	Corticosteroids for systemic use	Corticosteroids for systemic use, plain	Glucocorticoids	Most prescribed list	0.05	1	No cancer or not considered carcinogenic	10	Default applied	10	serious adverse effects at LTD	10	intended for chronic use with no or limited chronic testing with evidence of increase in effects with longer durations	3	Lack of multigenerational study to appropriately qualify reproductive and developmental risks	10	endocrine effects intended effects of API	30000	1.7e-06	0.005	Jubilant Cadista	2011-03-01
Metoprolol	51384-51-1	C07AB02	Cardiovascular System	Beta blocking agents	Beta blocking agents	Beta blocking agents, selective	Most prescribed list	0.31	1	No cancer or not considered carcinogenic	10	Default applied	10	Black Box Warning	1	Sufficient data available	3	Lack of multigenerational study to appropriately qualify reproductive and developmental risks	1	no evidence of endocrine activity caused by API	300	0.001	3	Watson	2011-02-01
Minocycline	10118-90-8	J01AA08	Anti-infective for Systemic Use	Antibacterials for systemic use	Tetracyclines	Tetracyclines	Additional API commonly included in Minnesota monitoring studies	2.5	1	No cancer or not considered carcinogenic - endocrine activity more appropriate	10	Default applied	10	Pregnancy Category D	10	intended for short-term use	3	Lack of multigenerational study to appropriately qualify reproductive and developmental risks	10	endocrine effects described in adverse reactions section of label	30000	8.3e-05	0.2	Par	2014-02-01	Tetracycline class APIs were evaluated together when assigning AFs for Cancer and Endocrine Activity. APIs included in this class evaluation for AFs were Demeclocycline, Doxycycline, Minocycline, Oxytetracycline, and Tetracycline. The APIs were all assigned a Cancer AF of 1 and an Endocrine Activity AF of 10
Montelukast	158966-92-8	R03DC03	Respiratory System	Drugs for obstructive airway diseases	Other systemic drugs for obstructive airway diseases	Leukotriene receptor antagonists	Most prescribed list	0.081	1	No cancer or not considered carcinogenic	10	Default applied	3	Default applied	1	Sufficient data available	3	Lack of multigenerational study to appropriately qualify reproductive and developmental risks	1	no evidence of endocrine activity caused by API	100	0.00081	2	Merck	2015-03-01	LTD calculated using dosing recommendations for 6-14 years of age (Mean weight for 14 yoa used – 61.5 kg)
Naproxen	22204-53-1	M01AE02	Musculo-Skeletal System	Anti-inflammatory and antirheumatic products	Anti-inflammatory and antirheumatic products, non-steroids	Propionic acid derivatives	Most prescribed list	6.25	1	No cancer or not considered carcinogenic	10	Default applied	10	Black Box Warning; serious adverse effects at LTD	3	intended for chronic use with sufficient chronic testing with evidence of increase in effects with longer durations	3	Lack of multigenerational study to appropriately qualify reproductive and developmental risks	1	no evidence of endocrine activity caused by API	1000	0.0063	20	Teva	2014-01-01
Nebivolol	118457-14-0	C07AB12	Cardiovascular System	Beta blocking agents	Beta blocking agents	Beta blocking agents, selective	Most prescribed list	0.031	1	Species specific cancer not relevant to humans	10	Default applied	10	Pregnancy Category C and LTD approximates dose in repro/dev studies	3	intended for chronic use with sufficient chronic testing with evidence of increase in effects with longer durations	3	Lack of multigenerational study to appropriately qualify reproductive and developmental risks	1	no evidence of endocrine activity caused by API	1000	3.1e-05	0.09	Forest	2014-01-01
Nifedipine	21829-25-4	C08CA05	Cardiovascular System	Calcium channel blockers	Selective calcium channel blockers with mainly vascular effects	Dihydropyridine derivatives	Additional API commonly included in Minnesota monitoring studies	0.38	1	No cancer or not considered carcinogenic	10	Default applied	10	Not intended for use in children, safety for children not established; Pregnancy Category C and LTD approximates dose in repro/dev studies	3	intended for chronic use with sufficient chronic testing with evidence of increase in effects with longer durations	3	Lack of multigenerational study to appropriately qualify reproductive and developmental risks	1	no evidence of endocrine activity caused by API	1000	0.00038	1	Greenstone	2015-02-01
Norfloxacin	70458-96-7	J01MA06	Anti-infective for Systemic Use	Antibacterials for systemic use	Quinolone antibacterials	Fluoroquinolones	Additional API commonly included in Minnesota monitoring studies	10	1	No cancer or not considered carcinogenic	10	Default applied	10	Black Box Warning; Not intended for use in children, safety for children not established; serious adverse effects at LTD	10	intended for short-term use	3	Lack of multigenerational study to appropriately qualify reproductive and developmental risks	1	no evidence of endocrine activity caused by API	3000	0.0033	10	Merck	2013-01-01	Norfloxacin: No identified label in DailyMed could be identified as the API was discontinued in the United States. The FDA Drugs Database has an archived label from 2013 located here, http://www.accessdata.fda.gov/drugsatfda_docs/label/2013/019384s066lbl.pdf , which was used in this evaluation. Norfloxacin was included in the evaluation as it has only been recently discontinued and is still monit…
Ofloxacin	82419-36-1	J01MA01	Anti-infective for Systemic Use	Antibacterials for systemic use	Quinolone antibacterials	Fluoroquinolones	Additional API commonly included in Minnesota monitoring studies	5	1	No cancer or not considered carcinogenic - no studies	10	Default applied	10	Black Box Warning; Not intended for use in children, safety for children not established	10	intended for short-term use	3	Lack of multigenerational study to appropriately qualify reproductive and developmental risks	1	no evidence of endocrine activity caused by API	3000	0.0017	5	Teva	2014-04-01
Olanzapine	132539-06-1	N05AH03	Nervous System	Psycholeptics	Antipsychotics	Diazepines, oxazepines, thiazepines and oxepines	Most prescribed list	0.037	10	Sufficient evidence of threshold MOA, AND HED threshold near or below LTD/MRHD - prolactin mediated mammary gland tumors	10	Default applied	10	Applicable Black Box Warning	3	intended for chronic use with sufficient chronic testing with evidence of increase in effects with longer durations	3	Lack of multigenerational study to appropriately qualify reproductive and developmental risks	10	endocrine effects described in warnings section of label; endocrine effects reported in animals that are relevant to humans	10000	3.7e-06	0.01	Eli Lily	2014-12-01	LTD calculated using dosing recommendations for 12-17 years of age (Mean weight for 17 yoa used – 68 kg)
Olmesartan medoxomil	144689-63-4	C09CA08	Cardiovascular System	Agents acting on the renin-angiotensin system	Angiotensin II antagonists, plain	Angiotensin II antagonists, plain	Most prescribed list	0.25	1	No cancer or not considered carcinogenic	10	Default applied	10	Black Box Warning; Pregnancy Category D	1	Sufficient data available	3	Lack of multigenerational study to appropriately qualify reproductive and developmental risks	1	no evidence of endocrine activity caused by API	300	0.00083	2	Daiichi Sankyo	2015-04-01
Oxycodone	76-42-6	N02AA05	Nervous System	Analgesics	Opioids	Natural opium alkaloids	Most prescribed list	0.25	1	No cancer or not considered carcinogenic - no studies	10	Default applied	10	Black Box Warning; Not intended for use in children, safety for children not established	10	intended for short-term use and/or subchronic with limited or no chronic testing	3	Lack of multigenerational study to appropriately qualify reproductive and developmental risks	10	endocrine effects described in pharmacodynamics section of label	30000	8.3e-06	0.02	Purdue	2014-04-01
Oxytetracycline	79-57-2	J01AA06	Anti-infective for Systemic Use	Antibacterials for systemic use	Tetracyclines	Tetracyclines	Additional API commonly included in Minnesota monitoring studies	6.25	1	No cancer or not considered carcinogenic - endocrine activity more appropriate	10	Default applied	10	Pregnancy Category D	10	intended for short-term use	3	Lack of multigenerational study to appropriately qualify reproductive and developmental risks	10	endocrine effects in reported in animals that are relevant to humans	30000	0.00021	0.6	No appropriate label	No appropriate label	•Tetracycline class APIs were evaluated together when assigning AFs for Cancer and Endocrine Activity. APIs included in this class evaluation for AFs were Demeclocycline, Doxycycline, Minocycline, Oxytetracycline, and Tetracycline. The APIs were all assigned a Cancer AF of 1 and an Endocrine Activity AF of 10 •Oxytetracycline: There is an identified label in DailyMed from 1987, however this label…
Penicillin V	87-08-1	J01CR50	Anti-infective for Systemic Use	Antibacterials for systemic use	Beta-lactam antibacterials, penicillins	Combinations of penicillins, incl. beta-lactamase inhibitors	Most prescribed list	9.38	1	No cancer or not considered carcinogenic	10	Default applied	10	serious adverse effects at LTD	10	intended for short-term use	3	Lack of multigenerational study to appropriately qualify reproductive and developmental risks	1	no evidence of endocrine activity caused by API	3000	0.0031	9	Teva	2014-12-01
Pentoxyifylline	6493-05-06	C04AD03	Cardiovascular System	Peripheral vasodilators	Peripheral vasodilators	Purine derivatives	Additional API commonly included in Minnesota monitoring studies	5	1	No cancer or not considered carcinogenic	10	Default applied	10	Not intended for use in children, safety for children not established	1	Sufficient data available	3	Lack of multigenerational study to appropriately qualify reproductive and developmental risks	1	no evidence of endocrine activity caused by API	300	0.017	50	Apotex Corp	2014-09-01
Pioglitazone	111025-46-8	A10BG03	Alimentary tract and metabolism	Drugs used in diabetes	Blood glucose lowering drugs, excl. insulins	Thiazolidinediones	Most prescribed list	0.19	10	sufficient evidence of threshold MOA, AND HED threshold near or below LTD/MRHD - bladder tumors	10	Default applied	10	Black Box Warning; Not intended for use in children, safety for children not established	3	intended for chronic use with sufficient chronic testing with evidence of increase in effects with longer durations	3	Lack of multigenerational study to appropriately qualify reproductive and developmental risks	1	no evidence of endocrine activity caused by API	10000	1.9e-05	0.05	Takeda	2013-11-01
Pravastatin	81093-37-0	C10AA03	Cardiovascular System	Lipid modifying agents	Lipid modifying agents, plain	HMG CoA reductase inhibitors	Most prescribed list	0.35	1	Evidence of threshold MOA, and HED threshold well above LTD/MRHD	10	Default applied	10	Pregnancy Category X	3	intended for chronic use with sufficient chronic testing with evidence of increase in effects with longer durations	3	Lack of multigenerational study to appropriately qualify reproductive and developmental risks	10	endocrine effects described in warnings section of label	10000	3.5e-05	0.1	Teva	2015-01-01	•LTD calculated using dosing recommendations for 8-13 years of age (Mean weight for 13 yoa used – 56.9 kg) •Statin class APIs were evaluated together when assigning an Endocrine Activity AF. APIs included in this class evaluation were Atorvastatin, Lovastatin, Pravastatin, Rosuvastatin, and Simvastatin. The APIs were all assigned an Endocrine Activity AF of 10
Prednisolone	50-24-8	H02AB06	Systemic Hormonal Preparations, excl. Sex Hormones and Insulins	Corticosteroids for systemic use	Corticosteroids for systemic use, plain	Glucocorticoids	Additional API commonly included in Minnesota monitoring studies	0.06	1	No cancer or not considered carcinogenic - no studies	10	Default applied	10	serious adverse effects at LTD	10	intended for chronic use with no or limited chronic testing with evidence of increase in effects with longer durations	3	Lack of multigenerational study to appropriately qualify reproductive and developmental risks	10	endocrine effects intended effects of API	30000	2e-06	0.006	Watson	2007-03-01
Prednisone	53-03-2	H02AB07	Systemic Hormonal Preparations, excl. Sex Hormones and Insulins	Corticosteroids for systemic use	Corticosteroids for systemic use, plain	Glucocorticoids	Most prescribed list	0.063	1	No cancer or not considered carcinogenic	10	Default applied	10	Pregnancy Category C and LTD approximates dose in repro/dev studies; serious adverse effects at LTD	10	intended for chronic use with no or limited chronic testing with evidence of increase in effects with longer durations	3	Lack of multigenerational study to appropriately qualify reproductive and developmental risks	10	endocrine effects intended effects of API	30000	2.1e-06	0.006	Watson	2010-05-01
Pregabalin	148553-50-8	N03AX16	Nervous System	Antiepileptics	Antiepileptics	Other antiepileptics	Most prescribed list	1.88	1	No cancer or not considered carcinogenic	10	Default applied	10	Not intended for use in children, safety for children not established	3	intended for chronic use with sufficient chronic testing with evidence of increase in effects with longer durations	1	Sufficient data available	1	no evidence of endocrine activity caused by API	300	0.0063	20	Parke-Davis/Pfizer	2014-08-01
Primidone	125-33-7	N03AA03	Nervous System	Antiepileptics	Antiepileptics	Barbiturates and derivatives	Additional API commonly included in Minnesota monitoring studies	9.38	10	Sufficient evidence of threshold MOA, AND HED threshold near or below LTD/MRHD - liver and thyroid cancers	10	Default applied	10	Pregnancy Category C and LTD approximates dose in repro/dev studies	3	intended for chronic use with sufficient chronic testing with evidence of increase in effects with longer durations	1	Sufficient data available	1	no evidence of endocrine activity caused by API	3000	0.0031	9	Amneal	2012-08-01
Progesterone	57-83-0	G03DA04	Genito Urinary System and Sex Hormones	Sex hormones and modulators of the genital system	Progestogens	Pregnen derivatives	Additional API commonly included in Minnesota monitoring studies	2.5	1	Cancer localized at site of administration and not relevant to oral administration alone	10	Default applied	10	Applicable Black Box Warning	10	intended for chronic use with no or limited chronic testing with evidence of increase in effects with longer durations	3	Lack of multigenerational study to appropriately qualify reproductive and developmental risks	10	endocrine effects intended effects of API	30000	8.3e-05	0.2	Akorn	2013-01-01
Promethazine	60-87-7	R06AD02	Respiratory System	Antihistamines for systemic use	Antihistamines for systemic use	Phenothiazine derivatives	Most prescribed list	0.23	1	No cancer or not considered carcinogenic	10	Default applied	10	Applicable Black Box Warning	10	intended for short-term use	3	Lack of multigenerational study to appropriately qualify reproductive and developmental risks	1	no evidence of endocrine activity caused by API	3000	7.7e-05	0.2	Cardinal	2013-08-01
Propranolol	525-66-6	C07AA05	Cardiovascular System	Beta blocking agents	Beta blocking agents	Beta blocking agents, non-selective	Additional API commonly included in Minnesota monitoring studies	0.38	1	No cancer or not considered carcinogenic	10	Default applied	10	Not intended for use in children, safety for children not established; Pregnancy Category C and LTD approximates dose in repro/dev studies	3	intended for chronic use with sufficient chronic testing with evidence of increase in effects with longer durations	1	Sufficient data available	10	endocrine effects described in warnings section of label	3000	0.00013	0.4	Heritage	2014-01-01
Propoxyphene	469-62-5	N02AC04	Nervous System	Analgesics	Opioids	Diphenylpropylamine derivatives	Additional API commonly included in Minnesota monitoring studies	4.88	1	No cancer or not considered carcinogenic - no studies	10	Default applied	10	serious adverse effects at LTD	10	intended for subchronic use with limited or no chronic testing	3	Lack of multigenerational study to appropriately qualify reproductive and developmental risks	1	no evidence of endocrine activity caused by API	3000	0.0016	4	Heritage	2010-10-01	Propoxyphene: There is an identified label in DailyMed from 2010 that was used for this evaluation. However, it was removed from the market in 2010 due to new information from a study that showed serious adverse cardiac effects at therapeutic doses. Propoxyphene was included in the evaluation as it has only recently been discontinued and is still monitored for in MN
Quetiapine	111974-69-7	N05AH04	Nervous System	Psycholeptics	Antipsychotics	Diazepines, oxazepines, thiazepines and oxepines	Most prescribed list	0.63	10	Sufficient evidence of threshold MOA, AND HED threshold near or below LTD/MRHD - prolactin mediated mammary gland tumors	10	Default applied	10	Black Box Warning, Pregnancy Category C and LTD approximates dose in repro/dev studies	3	intended for chronic use with sufficient chronic testing with evidence of increase in effects with longer durations	3	Lack of multigenerational study to appropriately qualify reproductive and developmental risks	10	endocrine effects described in adverse reactions section of label	10000	6.3e-05	0.2	AstraZeneca	2013-10-01
Ranitidine	66357-35-5	A02BA02	Alimentary tract and metabolism	Drugs for acid related disorders	Drugs for peptic ulcer and gastro-esophageal reflux disease (GORD)	H2-receptor antagonists	Most prescribed list	2	1	No cancer or not considered carcinogenic	10	Default applied	3	Default applied	1	Sufficient data available	3	Lack of multigenerational study to appropriately qualify reproductive and developmental risks	1	no evidence of endocrine activity caused by API	100	0.02	60	Sandoz	2004-02-01	LTD calculated using BW dosing information directly from the corresponding label for any <18 years of age, no separate calculations
Risperidone	106266-06-2	N05AX08	Nervous System	Psycholeptics	Antipsychotics	Other antipsychotics	Most prescribed list	0.0074	10	Sufficient evidence of threshold MOA, AND HED threshold near or below LTD/MRHD - prolactin mediated mammary gland tumors	10	Default applied	10	Black Box Warning; Pregnancy Category C and LTD approximates dose in repro/dev studies	3	intended for chronic use with sufficient chronic testing with evidence of increase in effects with longer durations	1	Sufficient data available	10	endocrine effects described in adverse reactions and warnings sections of label	3000	2.5e-06	0.007	Apotex Corp	2014-10-01	LTD calculated using dosing recommendations for 12-17 years of age (Mean weight for 17 yoa used – 68 kg)
Rosuvastatin	287714-41-4	C10AA07	Cardiovascular System	Lipid modifying agents	Lipid modifying agents, plain	HMG CoA reductase inhibitors	Most prescribed list	0.063	1	Evidence of threshold MOA, and HED threshold well above LTD/MRHD	10	Default applied	10	Pregnancy Category X	3	intended for chronic use with sufficient chronic testing with evidence of increase in effects with longer durations	3	Lack of multigenerational study to appropriately qualify reproductive and developmental risks	10	endocrine effects described in warnings section of label	10000	6.3e-06	0.02	AstraZeneca	2014-07-01	Statin class APIs were evaluated together when assigning an Endocrine Activity AF. APIs included in this class evaluation were Atorvastatin, Lovastatin, Pravastatin, Rosuvastatin, and Simvastatin. The APIs were all assigned an Endocrine Activity AF of 10
Sertraline	79617-96-2	N06AB06	Nervous System	Psychoanaleptics	Antidepressants	Selective serotonin reuptake inhibitors	Most prescribed list	0.31	1	No cancer or not considered carcinogenic	10	Default applied	10		1	Sufficient data available	3	Lack of multigenerational study to appropriately qualify reproductive and developmental risks	10	endocrine effects intended effects of API; endocrine effects described in warnings section of label	3000	0.0001	0.3	Roerig	2014-06-01
Sildenafil	139755-83-2	G04BE03	Genito Urinary System and Sex Hormones	Urologicals	Urologicals	Drugs used in erectile dysfunction	Most prescribed list	0.13	1	No cancer or not considered carcinogenic	10	Default applied	10	Not intended for use in children, safety for children not established; serious adverse effects at LTD	3	intended for chronic use with sufficient chronic testing with evidence of increase in effects with longer durations; intermittent usage	3	Lack of multigenerational study to appropriately qualify reproductive and developmental risks	1	no evidence of endocrine activity caused by API	1000	0.00013	0.4	Pfizer	2015-03-01
Simvastatin	79902-63-9	C10AA01	Cardiovascular System	Lipid modifying agents	Lipid modifying agents, plain	HMG CoA reductase inhibitors	Most prescribed list	0.063	1	Evidence of threshold MOA, and HED threshold well above LTD/MRHD	10	Default applied	10	Pregnancy Category X	3	intended for chronic use with sufficient chronic testing with evidence of increase in effects with longer durations	3	Lack of multigenerational study to appropriately qualify reproductive and developmental risks	10	endocrine effects described in warnings section of label	10000	6.3e-06	0.02	Lupin	2014-04-01	Statin class APIs were evaluated together when assigning an Endocrine Activity AF. APIs included in this class evaluation were Atorvastatin, Lovastatin, Pravastatin, Rosuvastatin, and Simvastatin. The APIs were all assigned an Endocrine Activity AF of 10
Sitagliptin	486460-32-6	A10BH01	Alimentary tract and metabolism	Drugs used in diabetes	Blood glucose lowering drugs, excl. insulins	Dipeptidyl peptidase 4 (DPP-4) inhibitors	Most prescribed list	1.25	1	Evidence of threshold MOA, and HED threshold well above LTD/MRHD	10	Default applied	10	Not intended for use in children, safety for children not established	3	intended for chronic use with sufficient chronic testing, but relatively new and uncertainty about duration related effects	3	Lack of multigenerational study to appropriately qualify reproductive and developmental risks	10	endocrine effects intended effects of API	10000	0.00013	0.4	Merck	2015-03-01
Sulfadiazine	68-35-9	J01EC02	Anti-infective for Systemic Use	Antibacterials for systemic use	Sulfonamides and trimethoprim	Intermediate-acting sulfonamides	Additional API commonly included in Minnesota monitoring studies	25	1	Species specific cancer not relevant to humans	10	Default applied	3	Default applied	10	intended for short-term use	3	Lack of multigenerational study to appropriately qualify reproductive and developmental risks	10	endocrine effects in reported in animals that are relevant to humans	10000	0.0025	7	Eon Labs	2013-06-01	Sulfonamide class APIs were evaluated together when assigning an Endocrine Activity AF. APIs included in this class evaluation were Sulfadiazine and Sulfamethizole. Sulfamethoxazole, an API evaluated to serve as a comparison to MDH developed health-based guidance values, was also evaluated along with the other sulfa class pharmaceuticals. The APIs were all assigned an Endocrine Activity AF of 10
Sulfamethizole	144-82-1	J01EB02	Anti-infective for Systemic Use	Antibacterials for systemic use	Sulfonamides and trimethoprim	Short-acting sulfonamides	Additional API commonly included in Minnesota monitoring studies	12.5	1	Species specific cancer not relevant to humans	10	Default applied	10	Not intended for use in children, safety for children not established	10	intended for short-term use	3	Lack of multigenerational study to appropriately qualify reproductive and developmental risks	10	endocrine effects in reported in animals that are relevant to humans	30000	0.00042	1	Roerig	2005-12-01	•Sulfamethizole: There is an identified label in DailyMed from 2005 that was used for this evaluation. However, there are currently no active products indicated for human use on the market at this time. Sulfamethizole was included in the evaluation as it has only recently been discontinued and is still monitored for in MN •Sulfonamide class APIs were evaluated together when assigning an Endocrine…
Tadalafil	171596-29-5	G04BE08	Genito Urinary System and Sex Hormones	Urologicals	Urologicals	Drugs used in erectile dysfunction	Most prescribed list	0.031	1	No cancer or not considered carcinogenic	10	Default applied	10	Not intended for use in children, safety for children not established	3	intended for chronic use with sufficient chronic testing, but relatively new and uncertainty about duration related effects	1	Sufficient data available	1	no evidence of endocrine activity caused by API	300	0.0001	0.3	Eli Lilly	2015-01-01
Tamsulosin	106133-20-4	G04CA02	Genito Urinary System and Sex Hormones	Urologicals	Drugs used in benign prostatic hypertrophy	Alpha-adrenoreceptor antagonists	Most prescribed list	0.005	1	No cancer or not considered carcinogenic	10	Default applied	10	serious adverse effects at LTD	1	Sufficient data available	3	Lack of multigenerational study to appropriately qualify reproductive and developmental risks	10	endocrine effects in reported in animals that are relevant to humans	3000	1.7e-06	0.005	Zydus	2014-10-01
Temazepam	846-50-4	N05CD07	Nervous System	Psycholeptics	Hypnotics and sedatives	Benzodiazepine derivatives	Most prescribed list	0.09	1	No cancer or not considered carcinogenic	10	Default applied	10	Pregnancy Category X	10	intended for short-term use	3	Lack of multigenerational study to appropriately qualify reproductive and developmental risks	1	no evidence of endocrine activity caused by API	3000	3e-05	0.08	Major Pharma	2015-03-01
Tetracycline	60-54-8	J01AA07	Anti-infective for Systemic Use	Antibacterials for systemic use	Tetracyclines	Tetracyclines	Additional API commonly included in Minnesota monitoring studies	18.8	1	No cancer or not considered carcinogenic - endocrine activity more appropriate	10	Default applied	10	Pregnancy Category D	10	intended for short-term use	3	Lack of multigenerational study to appropriately qualify reproductive and developmental risks	10	endocrine effects in reported in animals that are relevant to humans	30000	0.00063	2	Aptalis	2014-04-01	Tetracycline class APIs were evaluated together when assigning AFs for Cancer and Endocrine Activity. APIs included in this class evaluation for AFs were Demeclocycline, Doxycycline, Minocycline, Oxytetracycline, and Tetracycline. The APIs were all assigned a Cancer AF of 1 and an Endocrine Activity AF of 10
Tramadol	27203-92-5	N02AX02	Nervous System	Analgesics	Opioids	Other opioids	Most prescribed list	2.5	1	Species specific cancer not relevant to humans; No cancer or not considered carcinogenic	10	Default applied	10	Pregnancy Category C and LTD approximates dose in repro/dev studies	3	intended for chronic use with sufficient chronic testing with evidence of increase in effects with longer durations	3	Lack of multigenerational study to appropriately qualify reproductive and developmental risks	1	no evidence of endocrine activity caused by API	1000	0.0025	7	Accord HealthCare	2014-09-01
Trazodone	19794-93-5	N06AX05	Nervous System	Psychoanaleptics	Antidepressants	Other antidepressants	Most prescribed list	1.88	1	No cancer or not considered carcinogenic	10	Default applied	10	Not intended for use in children, safety for children not established	3	intended for chronic use with no increase in effects with longer durations, extensive human use data, but no or limited chronic animal studies	3	Lack of multigenerational study to appropriately qualify reproductive and developmental risks	10	endocrine effects intended effects of API; endocrine effects described in warnings section of label	10000	0.00019	0.5	Apotex Corp	2013-05-01
Triamterene	396-01-0	C03DB02	Cardiovascular System	Diuretics	Potassium-sparing agents	Other potassium-sparing agents	Most prescribed list	0.47	1	Evidence of threshold MOA, and HED threshold well above LTD/MRHD	10	Default applied	10	Not intended for use in children, safety for children not established	1	Sufficient data available	3	Lack of multigenerational study to appropriately qualify reproductive and developmental risks	1	no evidence of endocrine activity caused by API	300	0.0016	4	Mylan	2015-01-01
Trimethoprim	738-70-5	J01EE01	Anti-infective for Systemic Use	Antibacterials for systemic use	Sulfonamides and trimethoprim	Combinations of sulfonamides and trimethoprim, incl. derivatives	Most prescribed list	4.57	1	No cancer or not considered carcinogenic - no studies	10	Default applied	10	Pregnancy Category D	10	intended for short-term use	3	Lack of multigenerational study to appropriately qualify reproductive and developmental risks	1	no evidence of endocrine activity caused by API	3000	0.0015	4	Teva	2014-03-01
Valsartan	137862-53-4	C09ACA03	Cardiovascular System	Agents acting on the renin-angiotensin system	Angiotensin II antagonists, plain	Angiotensin II antagonists, plain	Most prescribed list	1	1	No cancer or not considered carcinogenic	10	Default applied	10	Applicable Black Box Warning	1	Sufficient data available	3	Lack of multigenerational study to appropriately qualify reproductive and developmental risks	1	no evidence of endocrine activity caused by API	300	0.0033	9	Novartis	2014-09-01
Verapamil	52-53-9	C08DA01	Cardiovascular System	Calcium channel blockers	Selective calcium channel blockers with direct cardiac effects	Phenylalkylamine derivatives	Additional API commonly included in Minnesota monitoring studies	2.25	1	No cancer or not considered carcinogenic	10	Default applied	10	Pregnancy Category C and LTD approximates dose in repro/dev studies	3	intended for chronic use with sufficient chronic testing with evidence of increase in effects with longer durations	3	Lack of multigenerational study to appropriately qualify reproductive and developmental risks	1	no evidence of endocrine activity caused by API	1000	0.0023	6	Apotex Corp	2014-01-01
Warfarin	81-81-2	B01AA03	Blood and Blood Forming Organs	Antithrombotic agents	Antithrombotic agents	Vitamin K antagonists	Most prescribed list	0.025	1	No cancer or not considered carcinogenic - no studies	10	Default applied	10	Applicable Black Box Warning	3	intended for chronic use with no increase in effects with longer durations, extensive human use data, but no or limited chronic animal studies	3	Lack of multigenerational study to appropriately qualify reproductive and developmental risks	1	no evidence of endocrine activity caused by API	1000	2.5e-05	0.07	Taro	2014-08-01
Zolpidem	82626-48-0	N05CF02	Nervous System	Psycholeptics	Hypnotics and sedatives	Benzodiazepine related drugs	Most prescribed list	0.063	1	Evidence of threshold MOA, and HED threshold well above LTD/MRHD	10	Default applied	10	Not intended for use in children, safety for children not established	10	intended for short-term use	3	Lack of multigenerational study to appropriately qualify reproductive and developmental risks	1	no evidence of endocrine activity caused by API	3000	2.1e-05	0.06	Teva	2014-11-01
End Sheet
